# Supplementary material for: Interactions between developmental and adult acclimation have distinct consequences for heat tolerance and heat stress recovery
Source: Oxford University Press journal article supplement (doi:10.1242/jeb.242479), 2021-07-26
Supplement: jeb242479supp.pdf [file jeb242479supp.pdf]

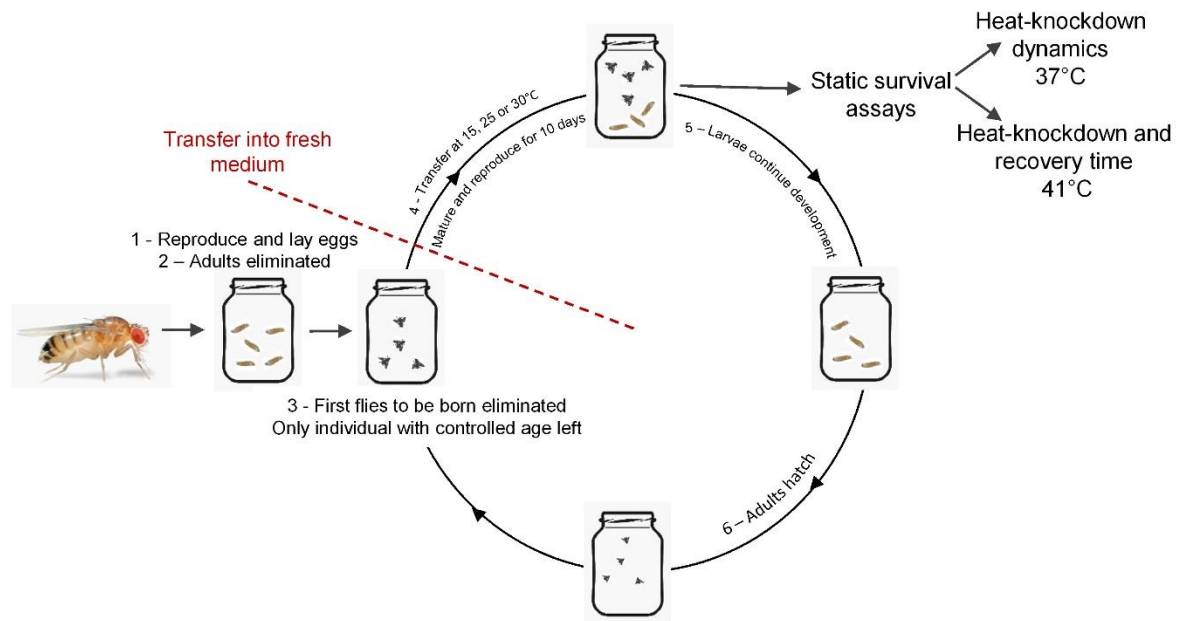

**Fig. S1.** Overview of the rearing and acclimation process performed for the full-factorial analysis. Batches of flies reared at either 15, 25 or 30°C (developmental acclimation) and hatched within 24 hours were transferred again on either 15, 25 or 30°C for 10 days to mature and lay eggs (adult acclimation), creating 9 thermal history conditions. After this 10-day acclimation period, adult flies were removed and use in static knockdown assays experiments aimed at assessing the impact of their thermal histories on heat-knockdown dynamics and recovery times, and a new generation was allowed to grow to start the cycle over.

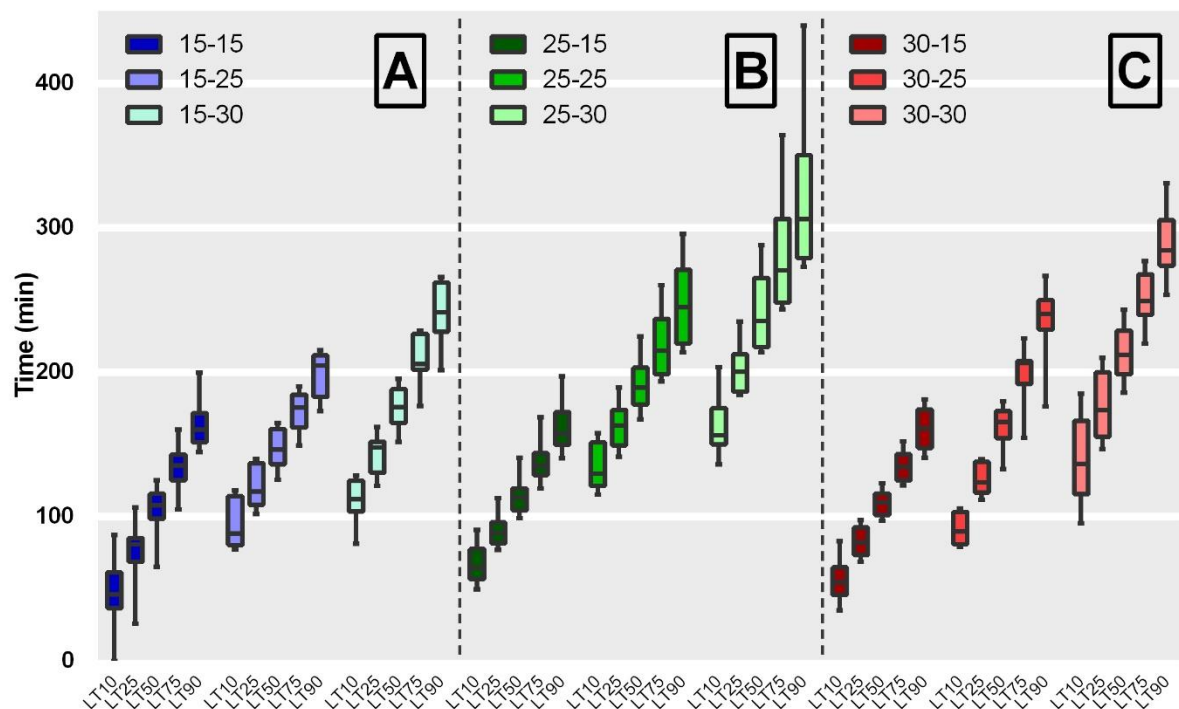

**Fig. S2.** Extracted percentiles from HKD curves of flies exposed to a constant 37°C, as a function of their thermal history ( $N=172\pm 32$  flies over 7-12 replicate per condition; mean  $\pm$  s.d). Lethal time (LT) refers to the time needed to reach a set percentage of mortality, namely 10% (LT10), 25% (LT25), 50% (LT50), 75% (LT75), and 90% (LT90) respectively. **Fig S1.A:** percentiles for flies developmentally acclimated at 15°C, and acclimated as adult at either 15, 25 or 30°C. **Fig S1.B:** percentiles for flies developmentally acclimated at 25°C, and acclimated as adult at either 15, 25 or 30°C. **Fig S1.C:** percentiles for flies developmentally acclimated at 30°C, and acclimated as adult at either 15, 25 or 30°C.

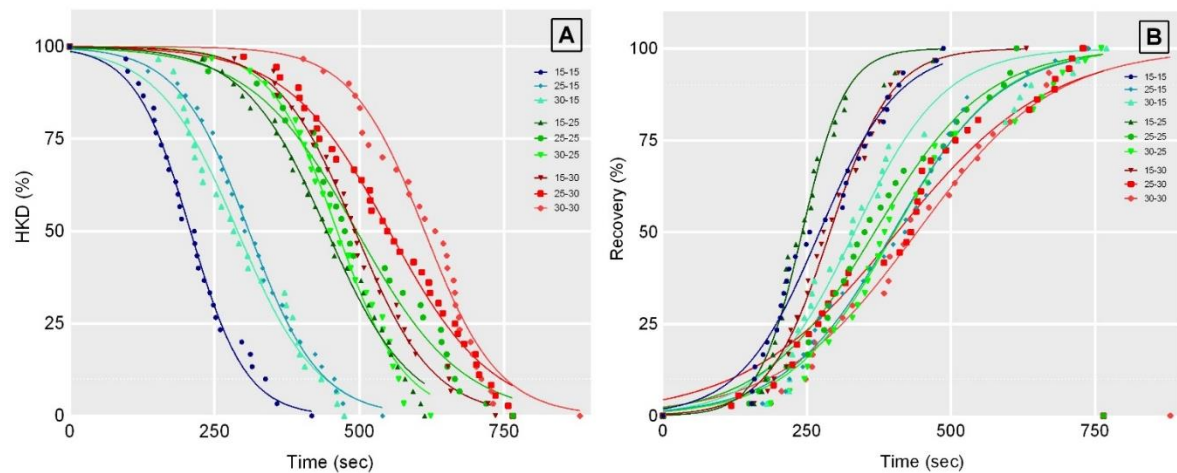

**Fig. S3.** Polynomial curve fitted on time to HKD at 41°C and on times to recovery for each thermal condition (N=30 per condition). **A:** polynomial curve fitted on time to HKD data. **B:** polynomial curve fitted on time to recovery data.

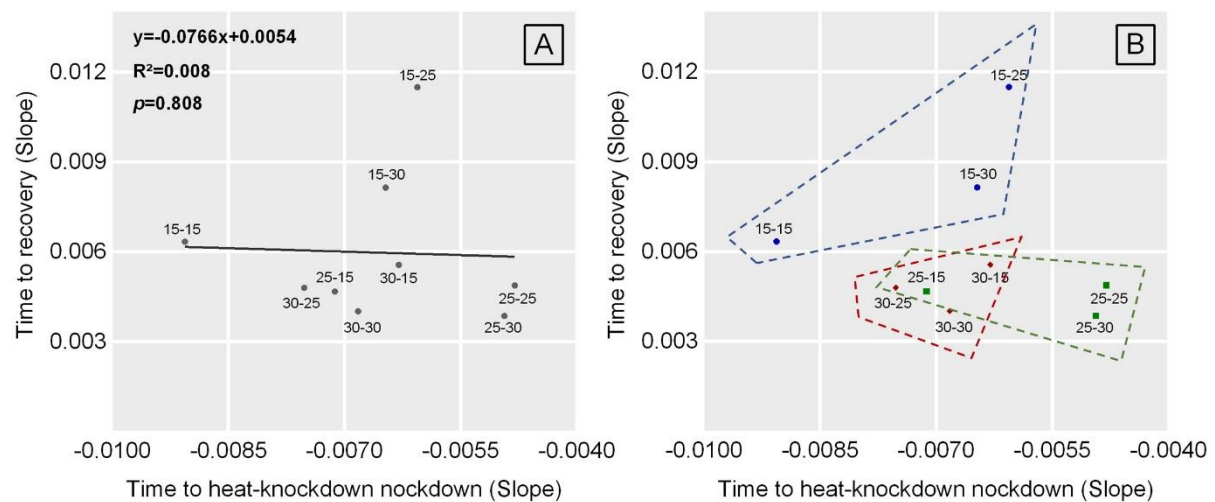

**Fig. S4:** Slopes of time to recovery plotted against slopes of time to heat-knockdown (N=30 per condition). **A:** Linear regression between slopes of time to recovery and slopes of time to heat-knockdown, across all developmental acclimation conditions. **B:** Slopes of time to recovery against slopes of time to heat-knockdown for flies developmentally acclimated at 15°C (blue), 25°C (green) and 30°C (red).

**Table S1.** Details of the linear regressions calculated for time to recovery as a function of time to HKD at 41°C in individual flies. No significant relationship was detected as a function of thermal histories of individuals with exception of flies reared at 25°C and adult acclimated at 30°C. A weak but significant relationship was found on the total dataset.

| Thermal history (°C) | Equation         | Slope  | R <sup>2</sup>     | p value  |
|----------------------|------------------|--------|--------------------|----------|
| 15-15                | y=0.0284x+277.5  | 0.028  | 5*10 <sup>-4</sup> | 0.90     |
| 15-25                | y=0.2317x+158.4  | 0.231  | 0.09               | 0.10     |
| 15-30                | y=-0.2504x+432.3 | -0.250 | 0.08               | 0.12     |
| 25-15                | y=0.3921x+286.9  | 0.392  | 0.07               | 0.15     |
| 25-25                | y=0.2919x+233.9  | 0.292  | 0.08               | 0.12     |
| 25-30                | y=0.6319x+66.1   | 0.632  | 0.22               | <0.01**  |
| 30-15                | y=0.3232x+286.3  | 0.323  | 0.03               | 0.33     |
| 30-25                | y=0.5770x+165.9  | 0.577  | 0.10               | 0.08     |
| 30-30                | y=0.4440x+179.3  | 0.444  | 0.08               | 0.13     |
| Total dataset        | y=0.2613x+256.3  | 0.261  | 0.07               | <0.01*** |

**Table S2.** Curve slope values and general goodness of the polynomial curve fit of time to HKD at 41°C and time to recovery values as a function of thermal histories of individuals.

| Thermal history (°C) | N flies | HKD Slopes | R <sup>2</sup> | Recovery slopes | R <sup>2</sup> |
|----------------------|---------|------------|----------------|-----------------|----------------|
| 15-15                | 30      | -0,009     | 0,99           | 0,006           | 0,97           |
| 15-25                | 30      | -0,006     | 0,99           | 0,011           | 0,98           |
| 15-30                | 30      | -0,006     | 0,99           | 0,008           | 0,99           |
| 25-15                | 30      | -0,007     | 1              | 0,005           | 0,98           |
| 25-25                | 30      | -0,005     | 0,98           | 0,005           | 0,99           |
| 25-30                | 36      | -0,005     | 0,99           | 0,004           | 0,98           |
| 30-15                | 30      | -0,006     | 0,97           | 0,006           | 0,95           |
| 30-25                | 30      | -0,007     | 0,99           | 0,005           | 0,98           |
| 30-30                | 30      | -0,007     | 0,97           | 0,004           | 0,99           |
